## **CrispRdesignR: A Versatile Guide RNA Design Package in R for CRISPR/Cas9 Applications**

Dylan Beeber<sup>1</sup> and Frédéric JJ Chain<sup>1</sup>

<sup>1</sup>Department of Biological Sciences, University of Massachusetts Lowell, 1 University Ave., Lowell, 01852 USA

**Corresponding authors:** Dylan Beeber, [dylan.beeber@gmail.com](mailto:dylan.beeber@gmail.com) and Frédéric Chain, [frederic\\_chain@uml.edu](mailto:frederic_chain@uml.edu)

**Keywords:** gRNA design, genome editing, guide efficiency, CRISPR, GUI, off-target

## 1 **Abstract**

2           The success of CRISPR/Cas9 gene editing applications relies on the efficiency of the  
3 single guide RNA (sgRNA) used in conjunction with the Cas9 protein. Current sgRNA design  
4 software vary in the details they provide on sgRNA sequence efficiency and are almost  
5 exclusively restricted to model organisms. The *crispRdesignR* package aims to address these  
6 limitations by providing comprehensive sequence features of the generated sgRNAs in a single  
7 program, which allows users to predict sgRNA efficiency and design sgRNA sequences for  
8 systems that currently do not have optimized efficiency scoring methods. *crispRdesignR* reports  
9 extensive information on all designed sgRNA sequences with robust off-target calling and  
10 annotation and can be run in a user-friendly graphical interface. The *crispRdesignR* package is  
11 implemented in R and has fully editable code for specialized purposes including sgRNA design  
12 in user-provided genomes. The package is platform independent and extendable, with its source  
13 code and documentation freely available at <https://github.com/dylanbeeber/crispRdesignR>.

## 15 **Introduction**

16           The CRISPR/Cas9 system has attracted attention in recent years for its ability to edit and  
17 regulate DNA in a wide variety of organisms and cell types. Using a strand of single guide RNA  
18 (sgRNA), the Cas9 protein is able to search a cellular genome and induce double stranded breaks  
19 at a target sequence complementary to the sgRNA that can then be modified<sup>1</sup>. However, several  
20 sequence features of the sgRNA and surrounding DNA sequence can influence the enzymatic  
21 activity of Cas9<sup>2</sup>. Crucially, the genomic DNA must contain a protospacer adjacent motif (PAM)  
22 in the region immediately following the 3' end of the target DNA for Cas9 to recognize the  
23 sequence<sup>1</sup>. Other sgRNA sequence features like nucleotide composition, presence of  
24 homopolymers, and self-complementarity can affect the activity of the sgRNA<sup>2</sup>.

25           The efficiency of the sgRNA is a major factor in the success of Cas9 gene editing  
26 applications<sup>2</sup>. To predict the efficiency of sgRNA sequences, scoring methods have been  
27 developed by applying machine learning techniques to CRISPR/Cas9 experimental data<sup>3,4,5</sup>.  
28 These efficiency scoring methods are accurate within the parameters of the experiments they  
29 were based on. However, the predictions are not necessarily generalizable to Cas9 applications in  
30 all cell types, organisms, and PAMs not included in the efficiency scoring experimental data. At  
31 their most predictive, scoring methods have been shown to only explain about 40% of the

32 variation in efficiency for most guides<sup>6</sup>. Known sequence features that decrease sgRNA  
33 efficiency are not always considered by scoring models<sup>3,4</sup>, which could result in suggesting  
34 inactive sgRNAs. The predictive power of these machine learning models may be improved by  
35 considering their predictions along with the known effects of sequence features in the genome.

36 Potential sgRNA sequences that contain a sequence feature not conducive to Cas9  
37 enzymatic activity can be scored highly by efficiency scoring methods that have not been trained  
38 on that feature. In order to generate the most active sgRNA, sequence features must be  
39 considered alongside efficiency scoring, however current programs designed to identify suitable  
40 sgRNAs often do not report all sequence features relevant to sgRNA efficiency. This forces users  
41 to run multiple programs to obtain all pertinent information. Features like sgRNA self-  
42 complementarity, presence of homopolymers, and potential off-target effects can drastically  
43 affect experimental outcomes and are often not considered by scoring models<sup>3,4</sup>. sgRNA  
44 sequences that are able to form hairpins with themselves or with other regions of the RNA  
45 backbone have been shown to either reduce or increase activity in separate situations<sup>7,8</sup>.  
46 Homopolymers that contain 4 or more consecutive identical base pairs (e.g. GGGG) can  
47 decrease cutting activity, and a homopolymer with 4 consecutive T's will be terminated  
48 prematurely in systems that utilize RNA polymerase III to create the sgRNA<sup>7</sup>. It is possible for  
49 Cas9 to target and cleave DNA sequences with multiple mismatches to the guide RNA resulting  
50 in off-target effects<sup>3</sup>. While often problematic for those working with Cas9, these off-target  
51 sequences as well as hairpins and homopolymers can be predicted from the sequence features of  
52 the guide RNA. Such features are expected to affect activity more consistently across different  
53 cell types, organisms and PAMs than specific nucleotide position features<sup>2</sup>.

54 We have developed the R package *crispRdesignR* to improve upon current sgRNA design  
55 software for CRISPR/Cas9 applications by providing all guides that match a customizable PAM  
56 sequence within a target region of any genome using the advanced Doench Rule Set 2 predictive  
57 model<sup>3</sup>, and by reporting sequence features often missing from other available programs but  
58 important in the CRISPR/Cas9 system including the GC content, self-complementarity, presence  
59 of homopolymers, and potential off-target effects for each candidate sgRNA. This is especially  
60 useful for working with non-standard Cas9 applications where the efficiency score may not be  
61 reliable. An optional table can be generated that displays supplementary information on where  
62 the potential off-target effects occur in a user-selected genome. The *crispRdesignR* package can

63 also be utilized with a graphical user interface for easier accessibility to non-bioinformaticians.  
64 In addition, the flexibility of this R package allows users to design sgRNAs in non-model  
65 organisms by inputting custom genomes and annotation files for analysis, highlighting the  
66 versatility of *crispRdesignR*.

67

## 68 **Materials and Methods**

### 69 **Model Features**

70 The predictive sgRNA efficiency scoring model used in *crispRdesignR* examines the  
71 same features as the Doench model<sup>3</sup> except for the cut site within the resulting protein, because  
72 not every Cas9 target site is located in a protein encoding region. Our program employs a  
73 gradient boosted regression model trained on the FC and RES data set used in Doench Rule Set  
74 2. The FC and RES data sets<sup>3</sup> contain about 5000 sgRNA sites plus context sequence (30-mer)  
75 for a variety of different genes. Ranks for each sgRNA site are calculated from read counts and  
76 normalized between 0 and 1, which is used by the gradient boosting algorithm *gbm*<sup>15</sup> to predict  
77 sgRNA activity. The Doench 2016 scoring method is trained on guide RNA utilizing the  
78 5'NGG3' PAM sequence. When designing guides for custom PAM sequences, *crispRdesignR*  
79 does not change the scoring method as many of the sequence features considered by Doench  
80 2016<sup>3</sup> are unrelated to the PAM sequence. It is however important to note that the accuracy score  
81 provided is expected to be less accurate when designing sgRNA sequences with custom PAMs.

82 The presence of specific nucleotides at certain positions in an sgRNA target site can  
83 influence the activity of that site. *crispRdesignR* will consider the single and dinucleotides at  
84 each position and convert them into features that our machine learning model uses to predict  
85 activity. In accordance with the Doench Rule Set 2<sup>3</sup>, our model accounts for the presence of  
86 position-dependent single nucleotides, position-dependent dinucleotides, single nucleotide count,  
87 dinucleotide count, GC count, nucleotides that bookend the PAM sequence, and thermodynamic  
88 features of the target sequence plus context region (30-mer). As in Doench Rule Set 2, nucleotide  
89 features are one-hot encoded, meaning that the presence of a nucleotide in a position is either  
90 “off” (0) or “on” (1). This leads to four features for each single nucleotide position (A, C, T, or  
91 G) and sixteen features for each dinucleotide position (AA, AC, AG, AT, etc.). One-hot  
92 encoding of these features is crucial for accurate machine learning predictions and is made  
93 possible by the *vtreat* package<sup>9</sup>. A position-independent total count of single and dinucleotides is

94 also used. This is simply the number of each specific nucleotide and dinucleotide combination in  
95 the 30-mer. Four features counting each single nucleotide and sixteen features counting each  
96 dinucleotide are recorded.

97 The GC count of the target site (20-mer) is taken and converted into a single feature (a  
98 number between 0 and 20). However, two additional GC features are taken, one binary variable  
99 for if the GC count is above 10 and another for if the GC count is below 10. The two nucleotides  
100 that bookend the “GG” of the PAM site are one-hot encoded as a dinucleotide feature. These are  
101 the nucleotides at position 25 and 28 of the 30-mer. As with the position-dependent dinucleotide  
102 features, these two nucleotides are converted into 16 binary features, one for each possible  
103 dinucleotide combination.

104 Four thermodynamic features are recorded, one for the predicted melting temperature  
105 ( $T_m$ ) of the sgRNA plus context sequence (30-mer), one for the  $T_m$  of the five nucleotides  
106 upstream from the PAM (positions 20-24), one for the  $T_m$  of the eight nucleotides upstream  
107 from the previous 5-mer (positions 12-19) and one for the  $T_m$  of the five nucleotides upstream  
108 from the 8-mer (positions 7-11). The Doench Rule Set 2 uses the  $T_m\_staluc$  function from  
109 biopython to calculate the  $T_m$  of these regions, so the function employed by *crispRdesignR*  
110 mirrors the  $T_m\_staluc$  function using thermodynamic data from Allawi and SantaLucia<sup>10</sup>.

111

## 112 **Model Predictions**

113 The model features were used to train a gradient boosted regression model with the R  
114 package *gbm*<sup>11</sup> on the FC and RES data used by the Doench Rule Set 2. Position-dependent  
115 features that contained no variation due to the restrictive PAM site were removed. Other features  
116 that showed no impact on the predictive power of the model were also removed. To predict the  
117 efficiency of package-generated sgRNA target sequences, the same features collected to design  
118 the model are collected for each possible target site. The generated data are then run through the  
119 *gbm* package and return a number from 0 to 1 for each target site, with 0 indicating less activity  
120 and 1 indicating greater activity.

121

## 122 **Off-Target Annotation**

123 Users may search any genome that is provided through the BSgenome package<sup>12</sup>.  
124 BSgenome also allows users to import custom genomes and DNA sequences from FASTA files

125 (using the *forgeBSgenomeDataPkg* command on a seed file that describes the paths to the raw  
126 sequence data in FASTA format; more information can be found in the BSgenome  
127 documentation). Genome annotation files (.gtf) can be acquired through the Ensembl and  
128 BioMart databases or users can upload their own. Larger genomes should be loaded as a  
129 compressed .gtf file (.gtf.gz) due to size limitations.

130 When off-target searching is on, each sgRNA sequence is checked for the presence of  
131 possible off-target sequences with up to four mismatches in the 20-mer. Off-target sequences  
132 must match the rules of the PAM site or be included in the list of possible 5'NGG3' PAM  
133 mismatches made available by Doench *et al.*<sup>3</sup>. Off-target sequences that contain 4 mismatches  
134 and do not directly match the PAM sequence are not reported by *crispRdesignR* as they are  
135 highly unlikely to be active<sup>3</sup>. The *matchPattern()* function available in the package *BioStrings*<sup>13</sup>  
136 is used to collect data on each possible off-target sequence. *matchPattern()* searches the target  
137 genome for matching patterns with between 1 and 4 mismatches. Indels are not considered when  
138 searching for matches. When searching genomes with many base pairs (e.g. over 1 billion) it is  
139 recommended to keep the DNA query sequence under 500 base pairs to keep the search time to  
140 several minutes. While the *matchPattern()* function is slower than other match finding methods  
141 because it does not require the genome to be pre-indexed, which itself takes additional time, this  
142 method allows users to easily search uploaded custom genomes without prior processing.

143 The locations of the possible off-target sequences are cross referenced with a user  
144 supplied genome annotation file (.gtf) and reports an off-target information table listing each  
145 possible off-target along with the sgRNA target site that it matches. *crispRdesignR* reports  
146 sgRNA target sequences and other perfect genomic matches in the off-target annotation table so  
147 that the user may verify their target location within the genome. The off-target information table  
148 lists the sequence type of the off-target, as well as the gene ID, gene name, and exon number. A  
149 cutting frequency determinant (CFD) score for each off-target is also listed in the off-target  
150 annotation table, which is calculated using data from Doench *et al.*<sup>3</sup> to estimate the likelihood of  
151 Cas9 targeting this sequence. Each mismatch position is assigned a value based on the change  
152 from one specific nucleotide to another and the values are multiplied, producing a number  
153 between 1 and 0, with 1 being more likely to be targeted and zero being less likely.  
154 *crispRdesignR* does not consider the position of the query target DNA sequence when finding

155 possible off-targets so that the user may verify the location of their sgRNA target sequences  
156 within the genome in the off-target annotation table.

157

## 158 **Functions**

159 All data is generated with a single function in R<sup>13</sup>: `sgRNA_design(userseq, genomename,`  
160 `gtfname, userPAM, calloffs = TRUE, annotateoffs = TRUE)`.

161 • *userseq*: The target sequence with which to generate sgRNA guides. Can either be a character  
162 sequence containing DNA bases (A,C,T,G) or the name of a FASTA or text file in the  
163 working directory.

164 • *genomename*: The name of a genome (in BSgenome format) to check for off-targets and  
165 provide locations for sgRNA guides. These genomes can be downloaded through BSgenome  
166 or compiled by the user.

167 • *gtfname*: The name of a genome annotation file (.gtf) in the working directory to annotate  
168 sgRNAs and off-target sequences.

169 • *userPAM*: An optional argument used to set a custom PAM for the sgRNA. If not set, the  
170 function will default to the "NGG" PAM. Warning: the accuracy of Doench efficiency scores  
171 has only been tested for the "NGG" PAM.

172 • *calloffs*: If TRUE, the function will search for off-targets in the genome chosen specified by  
173 the genomename argument. If FALSE, off-target calling will be skipped.

174 • *annotateoffs*: If TRUE, the function will provide annotations for the off-targets called using  
175 the genome annotation file specified by the gtfname argument. If FALSE, off-target  
176 annotation will be skipped.

177 • *getsgRNAdata(x)*: This command is used to retrieve the data on the generated sgRNA  
178 sequences, where x is the raw data generated by `sgRNA_design()`.

179 • *getofftargetdata(x)*: This command is used to retrieve the additional off-target data, where x is  
180 the raw data generated by `sgRNA_design()`.

181 `crispRdesignR` makes use of the R packages `vtreat`<sup>9</sup>, `gbm`<sup>11</sup>, `Bsgenome`<sup>12</sup>, `BioStrings`<sup>14</sup>,  
182 `shiny`<sup>15</sup>, and `stringr`<sup>16</sup>. Sequence homology features are calculated based on the gRNA  
183 interaction screen reported in Thyme *et. al.*<sup>17</sup>.

184

## 185 **Results**

186           The *crispRdesignR* tool is built entirely in the R programming language, utilizing various  
187 packages to assist with different aspects of the program (see Materials and Methods). The  
188 program can be run on the command line or through a graphical user interface (GUI). Guide  
189 RNAs are designed based on a 23 base pair sequence from a user-input DNA sequence or  
190 FASTA file that ends with the PAM. The only hard limitation on DNA regions that can be used  
191 as guide RNA is the presence of the PAM site, 5'NGG3' in the case of spCas9, the most  
192 commonly used Cas9 enzyme. In order to effectively provide a score for the experimentally-  
193 supported scoring method used in *crispRdesignR*, flanking sequence is also collected; this  
194 flanking sequence includes the four base pairs before the 5' end of the sgRNA and three base  
195 pairs after the 3' end of the PAM sequence. In total, a region of 30 bases pairs is collected for  
196 each possible sgRNA. The R package searches for sgRNAs from the input and returns a table  
197 listing candidate sgRNAs and their sequence features, and optionally returns annotated off-target  
198 information in a user-chosen genome (Figure 1). The GC content of each target sequence is  
199 calculated excluding the PAM site, as the GC content of the PAM does not affect binding to the  
200 target region<sup>3</sup>. The self-complementarity score provided by *crispRdesignR* includes possible  
201 regions of self-complementarity within both the sgRNA target sequence and the region on the  
202 sgRNA backbone that is prone to forming hairpins. Homopolymers are detected by searching for  
203 strings of 4 or more consecutive base pairs.

204

## 205 **Featurization**

206           *crispRdesignR* has adopted the efficiency scoring method developed in Doench *et al.*  
207 (2016), employing a gradient boosted regression model trained on the FC and RES data set used  
208 in Doench Rule Set 2. In accordance with the Doench Rule Set 2, our model accounts for the  
209 presence of position-dependent single nucleotides, position-dependent dinucleotides, single  
210 nucleotide count, dinucleotide count, GC count, nucleotides that bookend the PAM sequence,  
211 and thermodynamic features of the target sequence plus context region (30-mer). The presence of  
212 specific nucleotides at certain positions in an sgRNA target site can influence the activity of that  
213 site. *crispRdesignR* considers the single and dinucleotides at each position and converts them  
214 into features that the machine learning model uses to predict activity.

215           To find off-target hits for the sgRNA, the genome from a user-selected species is loaded  
216 into the program through the Bsgenome<sup>12</sup> package in R, and each guide RNA is then searched



217 through the genome for up to 4 mismatches. Once a complete list of matching sequences with  
218 genomic locations has been collected, the program then cross-references the matching locations  
219 with gene information provided in a user-input gene annotation file (.gtf). If the sgRNA matches  
220 a position in a gene, *crispRdesignR* reports the gene name as well as whether the match lies in a  
221 coding region.

222 Running *crispRdesignR* will output two results tables (Figure 2). The first table contains  
223 the information on each individual sgRNA, including the sequence, PAM, location, direction  
224 relative to the target sequence, GC content, homopolymer presence, self-complementarity, off-  
225 target matches, and predicted efficiency score. The second table contains the information about  
226 each off-target match, including the original sgRNA, off-target sequence, chromosome, location,  
227 direction relative to the target sequence, number of mismatches, gene ID, gene name, type of  
228 DNA, and exon number. These tables can be sorted and searched through the GUI or  
229 downloaded as .csv files for further analysis. The location of the original sgRNA target sequence  
230 in the genome can be found in the off-target information section for identity verification. If no  
231 genome is provided or off-target searching is skipped, no data will be provided in the off-target  
232 matches column or the off-target information table.

233

## 234 **Benchmarking**

235 Programs used to design sgRNA sequences often rely on predictive models but fail to  
236 report other sequence features that impact Cas9 enzymatic activity. In other cases, the  
237 information reported is calculated without excluding the PAM site, which is a recognition site for  
238 the protein and is not found in the sgRNA sequence. For example, CHOPCHOP v2<sup>18,19</sup> is one of  
239 the few applications that will provide the GC content of each sgRNA sequence, but it provides  
240 the GC content of both the target sequence plus the PAM site, instead of the target site alone  
241 (however, this has been corrected in the newer version of CHOPCHOP (v3)<sup>20</sup>).

242 The *crispRdesignR* software excludes the PAM site from the sequence information  
243 reported and provides more sequence features to the user than other prominent free sgRNA  
244 design programs (Table 1). Its ability to search custom genomes and annotation files is essential  
245 when designing targets for non-model organisms and non-standard cell types. The ability to use  
246 customized PAMs in *crispRdesignR* permits the design of sgRNAs for uncommon Cas9 proteins.  
247 Another R-based program, CRISPRseek<sup>21</sup>, also allows users to design sgRNA in custom

248 genomes with non-standard PAMs, but lacks a GUI and does not report several important  
249 sequence features such as hairpins, GC content, and homopolymers.

## 250 251 **Speed Comparisons**

252 *crispRdesignR* has relatively fast runtimes to discover sgRNA sequences compared to  
253 other tools, although using custom genomes that are not pre-indexed leads to increased runtimes  
254 when choosing to call and annotate off-targets (Table 2). Most other web-based programs have  
255 pre-indexed genomes for fast off-target calling, but indexing can take several hours to perform  
256 and as such is not always ideal for users uploading custom genomes or for few queries. On a  
257 desktop with 3.4 GHz CPU and 8.00 GB RAM, the run time for a 128 bp sequence (“DAK1  
258 short”, provided with the program) in *S. cerevisiae* averages out to 8 seconds in *crispRdesignR*  
259 when calling off-targets (3 seconds without off-target calling) compared to 7 seconds in  
260 *CRISPOR*<sup>22</sup> and 5 seconds in *CHOPCHOP* v2<sup>19</sup>. GuideScan<sup>23</sup> has some of the shortest runtimes  
261 when genomic coordinates are known beforehand and provided (2-3 seconds in *H. sapiens* and *S.*  
262 *cerevisiae*), but the web application can take over a minute if provided a FASTA file when  
263 searching the human genome. *crispRdesignR* and *CRISPRseek*<sup>23</sup> are comparable in terms of  
264 speed, with *crispRdesignR* gaining a speed advantage when searching smaller genomes and  
265 *CRISPRseek* gaining an advantage in larger genomes. When performing off-target searches in  
266 the human genome, each additional sgRNA generated by *crispRdesignR* will add about 1 minute  
267 of run time. To reduce run-time when searching for off-targets, it is recommended that users  
268 keep DNA query sequences under 250 bases pairs when searching against a genome containing  
269 over a billion base pairs.

## 270 271 **Discussion**

272 When utilizing other web-based sgRNA design programs, a user is often limited by a list  
273 of preinstalled genomes. *crispRdesignR* sets itself apart by allowing the user to import a custom  
274 genome and/or genome annotation file to search for sgRNAs and off-target effects. Allowing  
275 custom genomes and providing extensive target sequence information makes *crispRdesignR*  
276 particularly useful when working with non-model organisms, non-standard cell types and  
277 uncommon PAMs. The *crispRdesignR* software provides comprehensive sequence features to the  
278 user that are often omitted from other prominent free sgRNA design programs. The complete

279 sequence feature information provided by *crispRdesignR* is very well-suited to applications  
280 where efficiency scores are of limited use. When using efficiency scoring methods with  
281 conditions that they have not been trained on (for example different organisms, cell types, and  
282 PAMs), the efficiency predictions will be less accurate. However, the predictive power of the  
283 model may not be completely lost if efficiency scoring methods are used in addition to known  
284 effects of various sequence features on activity to eliminate inactive sgRNA<sup>3</sup>.

285 The open source nature of *crispRdesignR* allows user to build on the features of the  
286 software for their specific uses. The gradient boosted regression model that *crispRdesignR* uses  
287 for efficiency scoring can be trained on other experimental data sets that contain the sgRNA  
288 sequence plus context (30-mer) and guide rankings assigned scores between 0 and 1. This allows  
289 for user-generated efficiency scoring models trained on data relevant to that user's needs.  
290 However, for this to be a strongly predictive model, activity data must be available and  
291 normalized for thousands of sgRNA sequences in that relevant context<sup>3</sup>. The accessibility of the  
292 output tables as .csv files generated by *crispRdesignR* also allow a user to easily isolate the  
293 sgRNA sequences and run them through other scoring applications that are more appropriate for  
294 a specific application but that lack the sequence features, off-target annotation, or genome  
295 customization of *crispRdesignR*.

296 The flexibility and detail that is provided by the robust off-target annotation system used  
297 by *crispRdesignR* currently limits the speed of the program. While other programs may allow a  
298 user to index genomes for quicker searching, the process of indexing a custom genome can be  
299 hardware intensive and overall slower than a few searches on an unindexed genome for off-  
300 targets, particularly for design applications in a small target region. For applications that require  
301 sgRNA design in a large target region (over 1000 base pairs) within a large genome (over 1  
302 billion base pairs), the user can turn off off-target calling in *crispRdesignR* to prevent long run  
303 times. Although web-based programs that access pre-indexed genomes offer superior speed, we  
304 show that they often report less sequence feature information, fewer off-targets, and they are  
305 limited to the genomes that can be searched to a pre-defined list.

306 Another R package, CRISPRseek<sup>23</sup>, uses similar methods of efficiency scoring and off-  
307 target calling, allowing for searching custom genomes and annotation files. However, it lacks the  
308 graphical user interface and several sequence features provided by *crispRdesignR*. The two  
309 programs both take longer to run than many of their web-based counterparts due to the ability to

310 use non-indexed genomes, although *crispRdesignR* has a speed advantage when searching  
311 smaller genomes while *CRISPRseek* is faster when searching larger genomes. Although both  
312 programs use the same efficiency scoring method, *CRISPRseek* requires the user to add python  
313 packages in order to obtain the scores based on Doench Rule Set 2<sup>3</sup>. *crispRdesignR* is able to  
314 provide scores based on Rule Set 2 completely within R. Each program contains exclusive  
315 features that the other lacks that may be useful in different settings. For example, *CRISPRseek*  
316 has the ability to filter sgRNA based on restriction enzyme cutting sites, while *crispRdesignR*  
317 detects possible self-complementary sgRNA sequences.

318         The R package *crispRdesignR* sets itself apart by allowing the user to import a custom  
319 genome and/or genome annotation file to search for sgRNAs and off-target effects, while  
320 providing extensive target sequence information and the option of an accessible GUI. These  
321 unique features make *crispRdesignR* particularly useful for non-bioinformaticians working with  
322 non-model organisms, non-standard cell types, and uncommon PAMs. Accessible source code  
323 further adds to the versatility of *crispRdesignR* and lends itself to integration with different  
324 analysis pipelines and efficiency scoring methods as future technological improvements are  
325 made.

326

## 327 **Data Availability**

328         The source code and example data for the *crispRdesignR* package is available at:  
329 <https://github.com/dylanbeeber/crispRdesignR>.

330

## 331 **Acknowledgements**

332         The authors thank Evelyn Schwager and two anonymous reviewers for critical suggestions and  
333 feedback on the manuscript.

334

## 335 **Competing Interests**

336         The authors declare no competing interests.

337

## 338 **Contributions**

339         D.B. conceived the project. D.B. and F.C. designed and structured the R package. D.B. wrote the  
340 code for *crispRdesignR* and performed the analyses. D.B. and F.C. wrote the manuscript.

341

## 342 **References**

- 343 1. Doudna JA, Charpentier E. The new frontier of genome engineering with CRISPR-Cas9.  
344 *Science*. 2014; 346.
- 345 2. Hsu P, Lander ES, Zhang F. Development and Applications of CRISPR-Cas9 for Genome  
346 Engineering. *Cell*. 2014; 157: 1262–1278.
- 347 3. Doench J, Fusi N, Sullender M, Hegde M, *et al.* Optimized sgRNA design to maximize  
348 activity and minimize off-target effects of CRISPR-Cas9. *Nat. Biotechnol.* 2016; 34: 185–195.
- 349 4. Moreno-Mateos M, Vejnar CE, Beaudoin JD, Fernandez JP, Mis EK, *et al.* CRISPRscan:  
350 designing highly efficient sgRNAs for CRISPR-Cas9 targeting in vivo. *Nat. Methods*. 2015; 12:  
351 982–988.
- 352 5. Bolukbasi M, Gupta A, Wolfe S. Creating and evaluating accurate CRISPR-Cas9 scalpels for  
353 genomic surgery. *Nat. Methods*. 2016; 13: 41-50.
- 354 6. Haeussler M, Schoenig K, Eckert H, Eschstruth A, Mianne J, *et al.* Evaluation of off-target  
355 and on-target scoring algorithms and integration into the guide RNA selection tool CRISPOR.  
356 *Genome Biol.* 2016; 17(148).
- 357 7. Xie S, Shen B, Zhang C, Huang Z, Zhang Y. sgRNACas9: A Software Package for Designing  
358 CRISPR sgRNA and Evaluating Potential Off-Target Cleavage Sites. *PLoS One*. 2014; 9(6).
- 359 8. Ma X. A robust CRISPR/Cas9 system for convenient high-efficiency multiplex genome  
360 editing in monocot and dicot plants. *Mol. Plant*. 2015; 8: 1274-1284.
- 361 9. Mount J, Zumel N. vtreat: A Statistically Sound 'data.frame' Processor/Conditioner. R package  
362 version 1.3.1; 2018.
- 363 10. Allawi H, SantaLucia, J. Thermodynamics and NMR of internal G.T mismatches in DNA.  
364 *Biochemistry*. 1997; 36(34).
- 365 11. Greenwell B, Boehmke B, Cunningham J. gbm: Generalized Boosted Regression Models. R  
366 package version 2.1.4; 2018.
- 367 12. Pagès H. BSgenome: Software infrastructure for efficient representation of full genomes and  
368 their SNPs. R package version 1.46.0; 2017.
- 369 13. R Core Team. R: A language and environment for statistical computing. R Foundation for  
370 Statistical Computing, Vienna, Austria; 2018.

- 371 14. Pagès H, Aboyoun P, Gentleman R, DebRoy S. Biostrings: Efficient manipulation of  
372 biological strings. R package version 2.46.0; 2017.
- 373 15. Chang W, Cheng J, Allaire JJ, Xie Yihui, McPherson J. Shiny: Web Application Framework  
374 for R. R package version 1.0.5; 2017.
- 375 16. Wickham H. stringr: Simple, Consistent Wrappers for Common String Operations. R  
376 package version 1.3.1; 2018.
- 377 17. Thyme S, Akhmetova, Montague TG, Valen E, Shier AF. Internal guide RNA interactions  
378 interfere with Cas9-mediated cleavage. *Nat Commun.* 2016; 7(11750).
- 379 18. Montague T, Cruz JM, Gagnon JA, Church GM, Valen E. CHOPCHOP: a CRISPR/Cas9 and  
380 TALEN web tool for genome editing. *Nucleic Acids Res.* 2014; 42: W401-W407.
- 381 19. Labun L, Montague TG, Gagnon JA, Thyme SB, Valen E. CHOPCHOP v2: a web tool for  
382 the next generation of CRISPR genome engineering. *Nucleic Acids Res.* 2016; 44: W272-W276.
- 383 20. Labun L, Montague TG, Krause M, Torres Cleuren YN, Tjeldnes H, Valen E. CHOPCHOP  
384 v3: expanding the CRISPR web toolbox beyond genome editing. *Nucleic Acids Res.* 2019; 47:  
385 W171-W174.
- 386 21. Zhu L, Holmes B, Aronin N, Brodsky M. CRISPRseek: a bioconductor package to identify  
387 target-specific guide RNAs for CRISPR-Cas9 genome-editing systems. *PloS One.* 2014; 9(9).
- 388 22. Concordet JP and Haeussler M. CRISPOR: intuitive guide selection for CRISPR/Cas9  
389 genome editing experiments and screens. *Nucleic Acids Res.* 2018; 46: W242–W245.
- 390 23. Perez A, Pritykin Y, Vidigal J, Chhangawala S, Zamparo L, *et al.*. GuideScan software for  
391 improved single and paired CRISPR guide RNA design. *Nature Biotechnol.* 2017; 35: 347-349.
- 392

393

| Software name         | CHOPCHOP v2 <sup>18,19</sup> | CRISPR Design <sup>3</sup> | CRISPRseek <sup>21</sup> | CRISPOR <sup>22</sup> | GuideScan <sup>23</sup> | crispRdesignR |
|-----------------------|------------------------------|----------------------------|--------------------------|-----------------------|-------------------------|---------------|
| Providing entity      | Harvard                      | Broad Institute            | UMASS Medical            | Tefor                 | MSKCC                   | UML           |
| All targets           | Yes                          | No                         | Yes                      | Yes                   | Yes                     | Yes           |
| Scoring method        | Customizable                 | Doench                     | Doench                   | Doench & M.-Mateos    | Doench                  | Doench        |
| Hairpins              | Yes                          | No                         | No                       | No                    | No                      | Yes           |
| GC content            | Yes                          | No                         | No                       | No                    | No                      | Yes           |
| Homopolymers          | No                           | No                         | No                       | No                    | No                      | Yes           |
| Max no. of mismatches | 3                            | 4                          | 4                        | 4                     | 3                       | 4             |
| PAM                   | Customizable                 | NGG, NNGRR                 | Customizable             | Customizable          | NGG, TTTN               | Customizable  |
| Off-target Annotation | No                           | Limited                    | Yes                      | Yes                   | No                      | Yes           |

394 **Table 1.** Feature comparisons between several prominent free sgRNA design programs  
 395 CHOPCHOP v2<sup>18,19</sup>, CRISPR Design<sup>3</sup>, CRISPRseek<sup>21</sup>, CRISPOR<sup>22</sup>, and GuideScan<sup>23</sup>. Features  
 396 reported include whether all targets that match the PAM are output (All targets), the scoring  
 397 method from Doench<sup>3</sup>, Moreno-Mateos<sup>4</sup>, or customizable), self-complementarity through hairpin  
 398 detection, GC content, homopolymer filtering, the maximum number of mismatches permitted  
 399 between the guide sequence and reference, the available PAM sequence, and whether off-target  
 400 sequences are reported and annotated.

401

| Test Sequence   | Genome                       | CHOP-CHOP <sup>19</sup> | CRISPR Design <sup>3</sup> | CRISPRseek <sup>23</sup> | CRISPOR <sup>22</sup> | Guide Scan <sup>23</sup> | crispRdesignR (no off-targets) | crispRdesignR (with off-target calling) |
|-----------------|------------------------------|-------------------------|----------------------------|--------------------------|-----------------------|--------------------------|--------------------------------|-----------------------------------------|
| DAK1 short      | <i>S. cerevisiae</i> (yeast) | 0:05                    | N/A                        | 2:10                     | 0:07                  | 0:02                     | 0:03                           | 0:08                                    |
| DAK1            | <i>S. cerevisiae</i> (yeast) | 0:18                    | N/A                        | 4:24                     | 0:19                  | 0:02                     | 0:14                           | 1:47                                    |
| MYBPC3 deletion | <i>H. sapiens</i> (human)    | 0:06                    | 0:15                       | 6:50                     | 0:10                  | 0:03                     | 0:03                           | 7:36                                    |
| Partial ADRB1   | <i>H. sapiens</i> (human)    | 0:34                    | 0:26                       | 14:35                    | 0:15                  | 0:03                     | 0:05                           | 15:42                                   |

402 **Table 2.** Runtime comparisons for example sequences in each program analyzed. Run times  
 403 (minutes:seconds) were averaged over three trials on a desktop PC with 3.4 GHz CPU and 8.00  
 404 GB RAM. Some programs offered a limited list of available genomes that prevented analysis  
 405 (indicated by N/A). The DAK1 short example sequence can be found on the *crispRdesignR*  
 406 github site; it is 128 bp long and generates 13 target sequences, with 35 off-targets. The DAK1  
 407 sequence contains 1780 bp and generates 170 target sequences, with 495 off-targets. The  
 408 MYBPC3 deletion sequence contains 57 bp and generates 6 target sequences, with 2,219 off-  
 409 targets. The Partial ADRB1 sequence contains 70 bp and generates 11 target sequences, with  
 410 9,200 off-targets.

411 **Figure 1.** A screen capture from the *crispRdesignR* GUI demonstrating the target sequence,  
412 genome selection, and genome annotation file inputs. Partial sgRNA results and off-target  
413 annotations are also shown.

414  
415 **Figure 2.** The output tables of *crispRdesignR* using a partial version of the DAK1 gene  
416 sequence, which is provided with the package download. Not all off-target matches are shown in  
417 the screenshot. Columns in the sgRNA table include sgRNA sequence, PAM, direction, start,  
418 end, GC content, presence of homopolymers, possible self-complementary sequences, efficiency  
419 score<sup>3</sup>, and number of matches in the user-provided genome with between 0 and 4 mismatches  
420 (MM). The Off-target information table includes the original sgRNA sequence, chromosome,  
421 start, end, number of mismatches, strand, CFD scores, matched sequence, gene ID, gene name,  
422 sequence type, and exon number.  
423



424 **Figure 1**

## sgRNA Designer

**Target Sequence**

ATGTCCGCTAAATCGTTTGAAGTC

Use FASTA or txt file as target sequence

**Select Genome**

Saccharomyces cerevisiae (UCSC.sacCer2)

**Choose genome annotation file (.gff)**

Browse... Saccharomyces\_cerev

Upload complete

Additional Options

Find sgRNA

## sgRNA Table

Download sgRNA

Show 25 entries Search:

| sgRNA sequence       | PAM sequence | Direction | Start | End | GC content |
|----------------------|--------------|-----------|-------|-----|------------|
| CCAGTCAATTCAAGTCTCAA | AGG          | +         | 31    | 53  | 0.40       |
| CAGTCAATTCAAGTCTCAA  | GGG          | +         | 32    | 54  | 0.35       |
| TGTGACTTCAAACGATTTAG | CGG          | -         | 34    | 56  | 0.35       |
| CCTTTGAGACTTGAATTGAC | TGG          | -         | 60    | 82  | 0.40       |

sgRNA sequence PAM sequen Direction Start End GC conte

Showing 1 to 4 of 4 entries Previous 1 Next

## Off-target Information

Note: this program may report sequences in the target region as potential off-target sequences

Download Off-Targets

Show 25 entries Search:

| sgRNA sequence          | Chromosome | Start | End   | Mismatches |
|-------------------------|------------|-------|-------|------------|
| CCAGTCAATTCAAGTCTCAAAGG | chrII      | 65493 | 65515 | 4          |

425

426

427 **Figure 2**

**sgRNA Table**

Download sgRNA

Show 25 entries

Search:

| sgRNA sequence       | PAM sequence | Direction | Start | End | GC content | Homopolymer | Self Complementary | Efficiency Score | MM0 | MM1 | MM2 | MM3 | MM4 |
|----------------------|--------------|-----------|-------|-----|------------|-------------|--------------------|------------------|-----|-----|-----|-----|-----|
| GGACATGAACCTACACACGC | CGG          | +         | 7     | 29  | 0.55       | FALSE       | 1                  | 0.7110890        | 1   | 0   | 0   | 0   | 1   |
| CCAATGAAACCGCGTGTGT  | AGG          | -         | 45    | 67  | 0.55       | FALSE       | 0                  | 0.6094593        | 1   | 0   | 0   | 0   | 1   |
| CATACCTTACCAATGAAAC  | CGG          | -         | 55    | 77  | 0.40       | FALSE       | 0                  | 0.5584608        | 1   | 0   | 0   | 0   | 1   |
| ATTGGTAAGGTATGTTGAG  | TGG          | +         | 34    | 56  | 0.40       | FALSE       | 0                  | 0.5584598        | 1   | 0   | 0   | 0   | 0   |
| CACGCCGTTTCATTGGTAA  | GGG          | +         | 22    | 44  | 0.50       | FALSE       | 0                  | 0.5026394        | 1   | 0   | 0   | 0   | 2   |
| ACAGCCGTTTCATTGGTA   | AGG          | +         | 21    | 43  | 0.50       | FALSE       | 0                  | 0.4909957        | 1   | 0   | 0   | 0   | 1   |
| CCTACACAGCCGTTTCAT   | TGG          | +         | 16    | 38  | 0.55       | FALSE       | 0                  | 0.4308757        | 1   | 0   | 0   | 0   | 0   |

sgRNA sequence PAM sequen Direction Start End GC conten Homopolymer Self Complementa Efficiency Sc MM0 MM1 MM2 MM3 MM4

Showing 1 to 7 of 7 entries

Previous 1 Next

**Off-target Information**

Note: this program may report sequences in the target region as potential off-target sequences

Download Off-Targets

Show 25 entries

Search:

| sgRNA sequence        | Chromosome | Start  | End    | Mismatches | Direction | CFD Scores | Off-target sequence    | Gene ID | Gene Name | Sequence Type               | Exon Number |
|-----------------------|------------|--------|--------|------------|-----------|------------|------------------------|---------|-----------|-----------------------------|-------------|
| CACGCCGTTTCATTGGTAAGG | chrVI      | 23615  | 23637  | 4          | +         | 0.091      | CATGCCGTTTGTGGTGAAGG   | YFL053W | DAK2      | gene, transcript, exon, CDS | 1           |
| CCAATGAAACCGCGTGTAGG  | chrVI      | 23609  | 23631  | 4          | -         | 0.403      | CCAACAAAACCGCATGCGTTGG | NA      | NA        | NA                          | NA          |
| CACGCCGTTTCATTGGTAAGG | chrVII     | 287767 | 287789 | 4          | +         | 0.000      | CACGCCGTTTCGTTTCTAATGG | NA      | NA        | NA                          | NA          |
| ACAGCCGTTTCATTGGTAAGG | chrVIII    | 247448 | 247470 | 4          | +         | 0.065      | TCACTCTGTTTCATGGGTACGG | YHR074W | QNS1      | gene, transcript,           | 1           |

428
